# Supplementary material for: Acetoacetate protects macrophages from lactic acidosis-induced mitochondrial dysfunction by metabolic reprograming
Source: PubMed Central journal article supplement (PMC8655019; doi:10.1038/s41467-021-27426-x), 2021-12-08
Supplement: 41467_2021_27426_MOESM2_ESM.pdf [file 41467_2021_27426_MOESM2_ESM.pdf]

## Reporting Summary

Nature Research wishes to improve the reproducibility of the work that we publish. This form provides structure for consistency and transparency in reporting. For further information on Nature Research policies, see our [Editorial Policies](#) and the [Editorial Policy Checklist](#).

### Statistics

For all statistical analyses, confirm that the following items are present in the figure legend, table legend, main text, or Methods section.

n/a Confirmed

- The exact sample size ( $n$ ) for each experimental group/condition, given as a discrete number and unit of measurement
- A statement on whether measurements were taken from distinct samples or whether the same sample was measured repeatedly
- The statistical test(s) used AND whether they are one- or two-sided  
*Only common tests should be described solely by name; describe more complex techniques in the Methods section.*
- A description of all covariates tested
- A description of any assumptions or corrections, such as tests of normality and adjustment for multiple comparisons
- A full description of the statistical parameters including central tendency (e.g. means) or other basic estimates (e.g. regression coefficient) AND variation (e.g. standard deviation) or associated estimates of uncertainty (e.g. confidence intervals)
- For null hypothesis testing, the test statistic (e.g.  $F$ ,  $t$ ,  $r$ ) with confidence intervals, effect sizes, degrees of freedom and  $P$  value noted  
*Give  $P$  values as exact values whenever suitable.*
- For Bayesian analysis, information on the choice of priors and Markov chain Monte Carlo settings
- For hierarchical and complex designs, identification of the appropriate level for tests and full reporting of outcomes
- Estimates of effect sizes (e.g. Cohen's  $d$ , Pearson's  $r$ ), indicating how they were calculated

*Our web collection on [statistics for biologists](#) contains articles on many of the points above.*

### Software and code

Policy information about [availability of computer code](#)

Data collection

Data analysis

For manuscripts utilizing custom algorithms or software that are central to the research but not yet described in published literature, software must be made available to editors and reviewers. We strongly encourage code deposition in a community repository (e.g. GitHub). See the Nature Research [guidelines for submitting code & software](#) for further information.

### Data

Policy information about [availability of data](#)

All manuscripts must include a [data availability statement](#). This statement should provide the following information, where applicable:

- Accession codes, unique identifiers, or web links for publicly available datasets
- A list of figures that have associated raw data
- A description of any restrictions on data availability

The authors declare that the data supporting the findings of this study are available within the paper. Raw confocal and electron microscopy datasets have been deposited in the BioStudies database under accession code S-BSST716 [<https://www.ebi.ac.uk/biostudies/studies/S-BSST716>]. Source data are provided with this paper.

## Field-specific reporting

Please select the one below that is the best fit for your research. If you are not sure, read the appropriate sections before making your selection.

Life sciences       Behavioural & social sciences       Ecological, evolutionary & environmental sciences

For a reference copy of the document with all sections, see [nature.com/documents/nr-reporting-summary-flat.pdf](https://www.nature.com/documents/nr-reporting-summary-flat.pdf)

## Life sciences study design

All studies must disclose on these points even when the disclosure is negative.

|                 |                                                                                                                                                                                                                                                                                                           |
|-----------------|-----------------------------------------------------------------------------------------------------------------------------------------------------------------------------------------------------------------------------------------------------------------------------------------------------------|
| Sample size     | Sample sizes were not predetermined by statistical methods. Sample sizes were chosen based on our prior experience and in order to be able to carry out statistical tests, and were similar to those generally employed in the field. All sample sizes are shown in the figure legends of our manuscript. |
| Data exclusions | No data were excluded from the analysis                                                                                                                                                                                                                                                                   |
| Replication     | All experiments were independently replicated at least 2-3 times and were successful. Number of repeats is provided in the figure legends.                                                                                                                                                                |
| Randomization   | Blood samples from which primary monocytes were purified were obtained from randomized healthy donors from the blood collection center of the university hospital of Angers, France.                                                                                                                      |
| Blinding        | Stitched images from TEM were reviewed and scored by a trained electron histopathologist in a blinded manner. For the other samples, blinding was not relevant as none of the readouts were subjective.                                                                                                   |

## Reporting for specific materials, systems and methods

We require information from authors about some types of materials, experimental systems and methods used in many studies. Here, indicate whether each material, system or method listed is relevant to your study. If you are not sure if a list item applies to your research, read the appropriate section before selecting a response.

### Materials & experimental systems

| n/a                                 | Involved in the study                                  |
|-------------------------------------|--------------------------------------------------------|
| <input type="checkbox"/>            | <input checked="" type="checkbox"/> Antibodies         |
| <input checked="" type="checkbox"/> | <input type="checkbox"/> Eukaryotic cell lines         |
| <input checked="" type="checkbox"/> | <input type="checkbox"/> Palaeontology and archaeology |
| <input checked="" type="checkbox"/> | <input type="checkbox"/> Animals and other organisms   |
| <input checked="" type="checkbox"/> | <input type="checkbox"/> Human research participants   |
| <input checked="" type="checkbox"/> | <input type="checkbox"/> Clinical data                 |
| <input checked="" type="checkbox"/> | <input type="checkbox"/> Dual use research of concern  |

### Methods

| n/a                                 | Involved in the study                              |
|-------------------------------------|----------------------------------------------------|
| <input checked="" type="checkbox"/> | <input type="checkbox"/> ChIP-seq                  |
| <input type="checkbox"/>            | <input checked="" type="checkbox"/> Flow cytometry |
| <input checked="" type="checkbox"/> | <input type="checkbox"/> MRI-based neuroimaging    |

## Antibodies

### Antibodies used

1. mAb rabbit anti-human LC3A/B (clone D3U4C), Cell Signaling Technology, Cat#12741 (1:1000 dilution)
2. pAb rabbit anti-human AMPK alpha, Cell Signaling Technology, Cat#2532 (1:1000 dilution)
3. pAb rabbit anti-human phospho-AMPK alpha (Thr172), Cell Signaling Technology, Cat#2531 (1:1000 dilution)
4. mAb mouse anti-human p62 Ick ligand (clone 3/P62 LCK LIGAND), BD Biosciences, Cat#610832 (1/1000 dilution)
5. pAb rabbit anti-human beta-actin, Abcam, Cat#ab227387 (1/5000 dilution)
6. mAb mouse anti-human HSC-70 (clone B-6), Santa Cruz, Cat#sc-7298 (1/2000 dilution)
7. pAb goat anti-rabbit IgG HRP, Invitrogen, Cat#G-21234 (1/1000 dilution)
8. pAb goat anti-mouse IgG HRP, Invitrogen, Cat#G-21040 (1/1000 dilution)
9. mAb mouse anti-human GLUT1 APC (clone 202915), R&D Systems, Cat#FAB1418A (1/50 dilution)
10. mAb mouse anti-human GLUT3 APC (clone 202017), R&D Systems, Cat#FAB1415G (1/20 dilution)
11. mAb mouse anti-human GLUT5 AF647 (clone 195205), R&D Systems, Cat#FAB1349R (1/100 dilution)
12. mAb mouse anti-human CD86 BV421 (clone 2331), BD Biosciences, Cat#562433 (1/100 dilution)
13. mAb mouse anti-human HLA-DR V450 (clone G46-6), BD Biosciences, Cat#561359 (1/50 dilution)
14. pAb rabbit anti-human BDH1, Proteintech, Cat#15417-1-AP (1/1000 dilution)

### Validation

All antibodies are commercially available, and validated by manufacturer.

1. <https://www.cellsignal.com/products/primary-antibodies/lc3a-b-d3u4c-xp-rabbit-mab/12741>
2. <https://www.cellsignal.com/products/primary-antibodies/ampka-antibody/2532>
3. <https://www.cellsignal.com/products/primary-antibodies/phospho-ampka-thr172-antibody/2531>
4. <https://www.bdbiosciences.com/en-us/products/reagents/microscopy-imaging-reagents/immunofluorescence-reagents/purified->

mouse-anti-p62-ick-ligand.610832

5. <https://www.abcam.com/beta-actin-antibody-ab227387.html>

6. <https://www.scbt.com/fr/p/hsc-70-antibody-b-6>

7. <https://www.thermofisher.com/antibody/product/Goat-anti-Rabbit-IgG-H-L-Cross-Adsorbed-Secondary-Antibody-Polyclonal/G-21234>

8. <https://www.thermofisher.com/antibody/product/Goat-anti-Mouse-IgG-H-L-Cross-Adsorbed-Secondary-Antibody-Polyclonal/G-21040>

9. [https://www.rndsystems.com/products/human-glut1-apc-conjugated-antibody-202915\\_fab1418a](https://www.rndsystems.com/products/human-glut1-apc-conjugated-antibody-202915_fab1418a)

10. [https://www.rndsystems.com/products/human-glut3-alexa-fluor-488-conjugated-antibody-202017\\_fab1415g](https://www.rndsystems.com/products/human-glut3-alexa-fluor-488-conjugated-antibody-202017_fab1415g)

11. [https://www.rndsystems.com/products/human-glut5-alexa-fluor-647-conjugated-antibody-195205\\_fab1349r](https://www.rndsystems.com/products/human-glut5-alexa-fluor-647-conjugated-antibody-195205_fab1349r)

12. <https://www.bdbiosciences.com/en-us/products/reagents/flow-cytometry-reagents/research-reagents/single-color-antibodies-ruo/bv421-mouse-anti-human-cd86.562433>

13. <https://www.bdbiosciences.com/en-us/products/reagents/flow-cytometry-reagents/research-reagents/single-color-antibodies-ruo/v450-mouse-anti-human-hla-dr.561359>

14. <https://www.ptglab.com/products/BDH1-Antibody-15417-1-AP.htm>

## Flow Cytometry

### Plots

Confirm that:

- The axis labels state the marker and fluorochrome used (e.g. CD4-FITC).
- The axis scales are clearly visible. Include numbers along axes only for bottom left plot of group (a 'group' is an analysis of identical markers).
- All plots are contour plots with outliers or pseudocolor plots.
- A numerical value for number of cells or percentage (with statistics) is provided.

### Methodology

Sample preparation

For macrophages preparation, peripheral blood mononuclear cells (PBMC) were obtained from healthy donors, monocytes were purified by magnetic cell sorting and differentiated for 5 days (or otherwise specified) in the presence of GM-CSF and the different components studied.

For flow cytometry cell surface staining, 200 000 cells/100µl were incubated with non specific human IgG before staining with fluorochrome-conjugated antibodies.

MitoTracker, SNARF or 7-AAD staining were performed according to the manufacturer's instructions.

Instrument

FACSCanto II

Software

FACS Diva

Cell population abundance

The purity of the sorted macrophages according to their mitochondrial polarization status (Mitotracker labelling) was routinely >99% and was checked by re-acquisition of a part of the sorted population.

Gating strategy

gating on FSC/SSC + viability marker (doublet discrimination was performed for cell sorting)

- Tick this box to confirm that a figure exemplifying the gating strategy is provided in the Supplementary Information.
